# Supplementary material for: High Sensitivity Cardiac Troponin T in Patients with Severe Chronic Kidney Disease and suspected Acute Coronary Syndrome
Source: Preprints.org preprint supplement (doi:10.20944/preprints202108.0213.v1), 2021-08-10
Supplement: Supplementary file 1 [file supplementary]

**High Sensitivity Cardiac Troponin T in Patients with Severe Chronic Kidney Disease and suspected Acute Coronary Syndrome**

**SUPPLEMENTARY CONTENT**

[Table S1. Baseline characteristics of patients with severe CKD. 3](#_Toc76822041)

[Table S2. Values of hs-cTnT during serial sampling in patients with normal renal function versus those with severe CKD. 5](#_Toc76822043)

[Table S3. Values of hs-cTnT during serial sampling in patients with severe CKD according to the indication for revascularization. 6](#_Toc76822045)

[Table S4. Diagnostic performance of hs-cTnT at serial sampling in patients with severe CKD. 7](#_Toc76822047)

[Table S5. Diagnostic performance at presentation and absolute changes of hs-cTnT in patients with severe CKD. 8](#_Toc76822048)

[Table S6. Outcomes at 30 days and one year of follow-up in patients with severe CKD. 9](#_Toc76822049)

[Figure S1. Flow chart of the selection process of patients with severe CKD included in the ROC-analysis. 10](#_Toc76822050)

[Figure S2. Correlation between hs-cTnT and creatinine levels. 11](#_Toc76822051)

[Figure S3. Kaplan Meier estimates of adverse events at one year. 12](#_Toc76822052)

[Figure S4. Independent predictors of adverse events at one year 13](#_Toc76822053)

## Table S1. Baseline characteristics of patients with severe CKD.

|  |  | | **Revascularization** | | |  |
| --- | --- | --- | --- | --- | --- | --- |
|  | **Total**  **290** | **No**  **68 (24)** | | | **Yes**  **222 (76)** | **P-value** |
| Age | 73 (64, 79) | 74 (63, 80) | | | 73 (64, 78) | 0.780 |
| Male | 204 (70) | 39 (57) | | | 165 (74) | 0.010 |
| **Risk factors** |  | | |  | | |
| BMI | 26 (23, 31) | 26 (23, 30) | | | 26 (23, 31) | 0.607 |
| Hypertension | 268 (92) | 63 (93) | | | 205 (92) | 1.000 |
| Hypercholesterolemia | 213 (73) | 49 (72) | | | 164 (74) | 0.756 |
| Diabetes mellitus | 162 (56) | 31 (46) | | | 131 (59) | 0.069 |
| Current smoking | 69 (32) | 13 (28) | | | 56 (33) | 0.597 |
| COPD | 55 (19) | 14 (21) | | | 41 (18) | 0.725 |
| Family history | 33 (39) | 4 (25) | | | 29 (42) | 0.263 |
| **History** |  |  | | |  |  |
| CAD | 205 (71) | 39 (57) | | | 166 (75) | 0.006 |
| 1-vessel CAD | 22 (8) | 6 (9) | | | 16 (7) | 0.795 |
| 2-vessel CAD | 32 (11) | 6 (9) | | | 26 (12) | 0.517 |
| 3-vessel CAD | 142 (51) | 27 (40) | | | 115 (54) | 0.051 |
| Previous MI | 157 (54) | 30 (44) | | | 127 (57) | 0.071 |
| Previous PCI | 162 (56) | 30 (44) | | | 132 (59) | 0.036 |
| Previous CABG | 95 (33) | 17 (25) | | | 78 (35) | 0.140 |
| Previous stroke | 43 (15) | 8 (12) | | | 35 (16) | 0.559 |
| PAD | 110 (38) | 20 (29) | | | 90 (41) | 0.116 |
| **Vital signs** |  | | |  | | |
| Systolic BP | 139 (120, 156) | 138 (117, 156) | | | 140 (120, 157) | 0.614 |
| Diastolic BP | 71 (62, 83) | 76 (66, 85) | | | 70 (61, 82) | 0.128 |
| Heart rate | 80 (71, 94) | 80 (69, 90) | | | 80 (72, 95) | 0.416 |
| SaO2 | 97 (95, 99) | 97 (95, 100) | | | 97 (95, 99) | 0.430 |
| Angina CCS Class | 4 (3, 4) | 3 (3, 4) | | | 4 (3, 4) | 0.06 |
| EGC changes | 179 (64) | 34 (52) | | | 145 (68) | 0.018 |
| ST-segment depression | 82 (29) | 10 (15) | | | 72 (34) | 0.003 |
| T-wave inversion | 84 (30) | 17 (26) | | | 67 (32) | 0.443 |
| LBBB | 34 (12) | 8 (12) | | | 26 (12) | 1.000 |
| Ns ST-segment elevations | 18 (6) | 3 (5) | | | 15 (7) | 0.578 |
| LVEF | 47 (35, 55) | 54 (34, 60) | | | 45 (35, 55) | 0.076 |
| GRACE risk score | 135 (118, 154) | 131 (111, 150) | | | 136 (119, 155) | 0.167 |
| **Renal function** |  | | |  | | |
| Creatinine, mg/dl | 3.2 (2.4, 5.7) | 3.0 (2.2, 5.0) | | | 3.3 (2.4, 5.7) | 0.176 |
| eGFR, mL/min/1.73m2 | 23 (18, 27) | 24 (18, 28) | | | 23 (18, 27) | 0.499 |
| **Stages of CKD** |  | | |  | | |
| eGFR 15-29 | 137 (47) | 36 (53) | | | 101 (45) | 0.331 |
| eGFR <15 | 19 (7) | 5 (7) | | | 14 (6) | 0.781 |
| CKD G5D | 134 (46) | 27 (40) | | | 107 (48) | 0.266 |
| **Intervention** |  | | |  | | |
| PCI | 197 (68) | 0 (0) | | | 197 (89) | <0.001 |
| CABG | 25 (9) | 0 (0) | | | 25 (11) | <0.001 |

Depicted are medians with interquartile ranges (IQR) or counts with frequencies (%). P-values are from Wilcoxon rank sum or Fisher´s Chi2 tests. Severe CKD defined as eGFR <30 mL/min/1.73m2. BMI: body mass index in kg/m2; BP: blood pressure; CABG: coronary artery bypass grafting; CAD: coronary artery disease; CCS: Canadian cardiovascular society; CKD: chronic kidney disease; COPD: chronic obstructive pulmonary disease; CKD G5D: chronic kidney disease G5 treated by dialysis; eGFR: estimated glomerular filtration rate according to the CKD-EPI creatinine equation; GRACE: the Global Registry of Acute Coronary Events; LBBB: left bundle-branch block, LVEF: left ventricular ejection fraction; MI: myocardial infarction; ns: non significant; PAD: peripheral artery disease; PCI: percutaneous coronary intervention; SaO2: arterial oxygen saturation.

## Table S2. Values of hs-cTnT during serial sampling in patients with normal renal function versus those with severe CKD.

| Hs-cTnT (ng/L) | Normal renal function  n=300 | Severe CKD  n=290 | P-value |
| --- | --- | --- | --- |
| Presentation | 25 (7-102) | 114 (52-314) | <0.01 |
| 3 hours | 29 (7-116) | 160 (74-369) | <0.01 |
| Peak | 58 (11-210) | 207 (79-537) | <0.01 |

Depicted are medians with interquartile ranges. P-values are from Wilcoxon rank sum test. Severe CKD defined as eGFR <30 mL/min/1.73m2. CKD: chronic kidney disease; eGFR: estimated glomerular filtration rate according to the CKD-EPI creatinine equation; hs-cTnT: high sensitivity cardiac troponin T.

## Table S3. Values of hs-cTnT during serial sampling in patients with severe CKD according to the indication for revascularization.

|  | Revascularization | | |
| --- | --- | --- | --- |
| Hs-cTnT (ng/L) | **No**  n=68 | **Yes**  n=222 | **P-value** |
| Presentation | 46 (28-81) | 160 (69-485) | <0.001 |
| 3 hours | 55 (29-88) | 194 (105-409) | <0.001 |
| 6 hours | 47 (31-96) | 212 (99-572) | <0.001 |
| Peak | 56 (32-93) | 282 (132-746) | <0.001 |

Depicted are medians with interquartile ranges. P-values are from Wilcoxon rank sum test. Severe CKD defined as eGFR <30 mL/min/1.73m2. CKD: chronic kidney disease; eGFR: estimated glomerular filtration rate according to the CKD-EPI creatinine equation; hs-cTnT: high sensitivity cardiac troponin T.

## **Table S4.** Diagnostic performance of hs-cTnT at serial sampling in patients with severe CKD.

|  | Hs-cTnT-0h | Hs-cTnT-3h | Hs-cTnT-peak |
| --- | --- | --- | --- |
| AUC (95% CI) | 0.81 (0.75-0.87) | 0.84 (0.75-0.93) | 0.86 (0.81-0.92) |
| ROC optimized cutoff  Sensitivity (95% CI)  Specificity (95% CI) | ≥ 55 ng/L  83 (77-88)  65 (52-77) | ≥ 84 ng/L  85 (76-91)  70 (46-87) | ≥ 95ng/L  84 (79-90)  78 (66-89) |
| 99th percentile  Sensitivity (95% CI)  Specificity (95% CI) | ≥ 14 ng/L  98 (95-99)  10 (2-19) | ≥ 14 ng/L  99 (94-100)  15 (4-39) | ≥ 14 ng/L  98 (95-100)  4 (1-15) |
| Specificity optimized cutoff (≥ 80%)  Sensitivity (95% CI)  Specificity (95% CI) | ≥ 95 ng/L  70 (63-77)  80 (68-91) | ≥ 96 ng/L  77 (68-85)  85 (61-96) | ≥ 112 ng/L  79 (73-85)  82 (71-92) |
| Sensitivity optimized cutoff (≥ 90%)  Sensitivity (95% CI)  Specificity (95% CI) | ≥ 37 ng/L  90 (85-94)  49 (35-63) | ≥ 56 ng/L  91 (84-96)  55 (32-76) | ≥ 71 ng/L  90 (86-95)  60 (45-73) |

Depicted are AUCs and different cutoff levels with sensitivities and specificities in percent and 95% confidence intervals (CI) of hs-cTnT at presentation, 3 hours and peak prior to angiography. Severe CKD defined as eGFR <30 mL/min/1.73m2. AUC: area under the receiver operating characteristic curve; CKD: chronic kidney disease; eGFR: estimated glomerular filtration rate according to the CKD-EPI creatinine equation; ROC: receiver operating characteristic curve.

## Table S5. Diagnostic performance at presentation and absolute changes of hs-cTnT in patients with severe CKD.

|  | Hs-cTnT-0h | │∆0h-3h│ | │∆0h-6h│ | 0h +│∆3-0h│ |
| --- | --- | --- | --- | --- |
| Median (IQR) | 130 (48, 411) | 27 (4, 108) | 65 (7, 301) | - |
| AUC (95% CI) | 0.81 (0.75-0.87) | 0.79 (0.64-0.95) | 0.84 (0.72-0.96) | 0.84 (0.75-0.89) |
| ROC optimized cutoff | ≥ 55 ng/L | ≥ 4 ng/L | ≥ 8 ng/L | 0h ≥ 55 ng/L or  │∆0h-3h│≥ 4 ng/L |
| Sensitivity (95% CI) | 83 (77-88) | 91 (81-96) | 84 (70-92) | 98 (91-100) |
| Specificity (95% CI) | 65 (52-77) | 64 (32-88) | 70 (35-92) | 55 (25-82) |
| PPV (95% CI) | 89 (85-94) | 94 (84-98) | 93 (80-98) | 93 (83-97) |
| NPV (95% CI) | 52 (39-64) | 54 (26-80) | 47 (22-73) | 86 (42-99) |

Depicted are medians in ng/L with interquartile ranges (IQR) and AUCs with 95% confidence intervals (95% CI) of hs-cTnT at presentation, absolute changes at 3 and 6 hours and the combination of hs-cTnT at presentation with absolute 3-hour changes. Severe CKD defined as eGFR <30 mL/min/1.73m2. AUC: area under the curve; CKD: chronic kidney disease; eGFR: estimated glomerular filtration rate according to the CKD-EPI creatinine equation; NPV: negative predictive value; PPV: positive predictive value.

## Table S6. Outcomes at 30 days and one year of follow-up in patients with severe CKD.

|  | Revascularization | | | |
| --- | --- | --- | --- | --- |
|  | **Total** | **No** | **Yes** | **P-value** |
| 30 days |  |  |  |  |
| All cause death | 14 (7) | 1 (2) | 13 (8) | 0.199 |
| MACE | 17 (8) | 0 (0) | 17 (11) | 0.015 |
| Cardiovascular death | 9 (4) | 0 (0) | 9 (6) | 0.214 |
| Myocardial infarction | 9 (5) | 0 (0) | 9 (6) | 0.120 |
| Unplanned revascularization | 6 (3) | 0 (0) | 6 (4) | 0.339 |
| 365 days |  |  |  |  |
| All cause death | 51 (29) | 5 (13) | 46 (34) | 0.010 |
| MACE | 71 (42) | 4 (11) | 67 (50) | <0.001 |
| Cardiovascular death | 29 (19) | 3 (8) | 26 (23) | 0.056 |
| Myocardial infarction | 49 (33) | 1 (3) | 48 (41) | <0.001 |
| Unplanned revascularization | 33 (24) | 2 (6) | 31 (31) | 0.002 |

Depicted are counts with frequencies (%). P-values are from log-rank tests. Severe CKD defined as eGFR <30 mL/min/1.73m2. CKD: chronic kidney disease; eGFR: estimated glomerular filtration rate according to the CKD-EPI creatinine equation; MACE: major adverse cardiovascular events (cardiovascular death, myocardial infarction, unplanned revascularization).

## Figure S1. Flow chart of the selection process of patients with severe CKD included in the ROC-analysis.


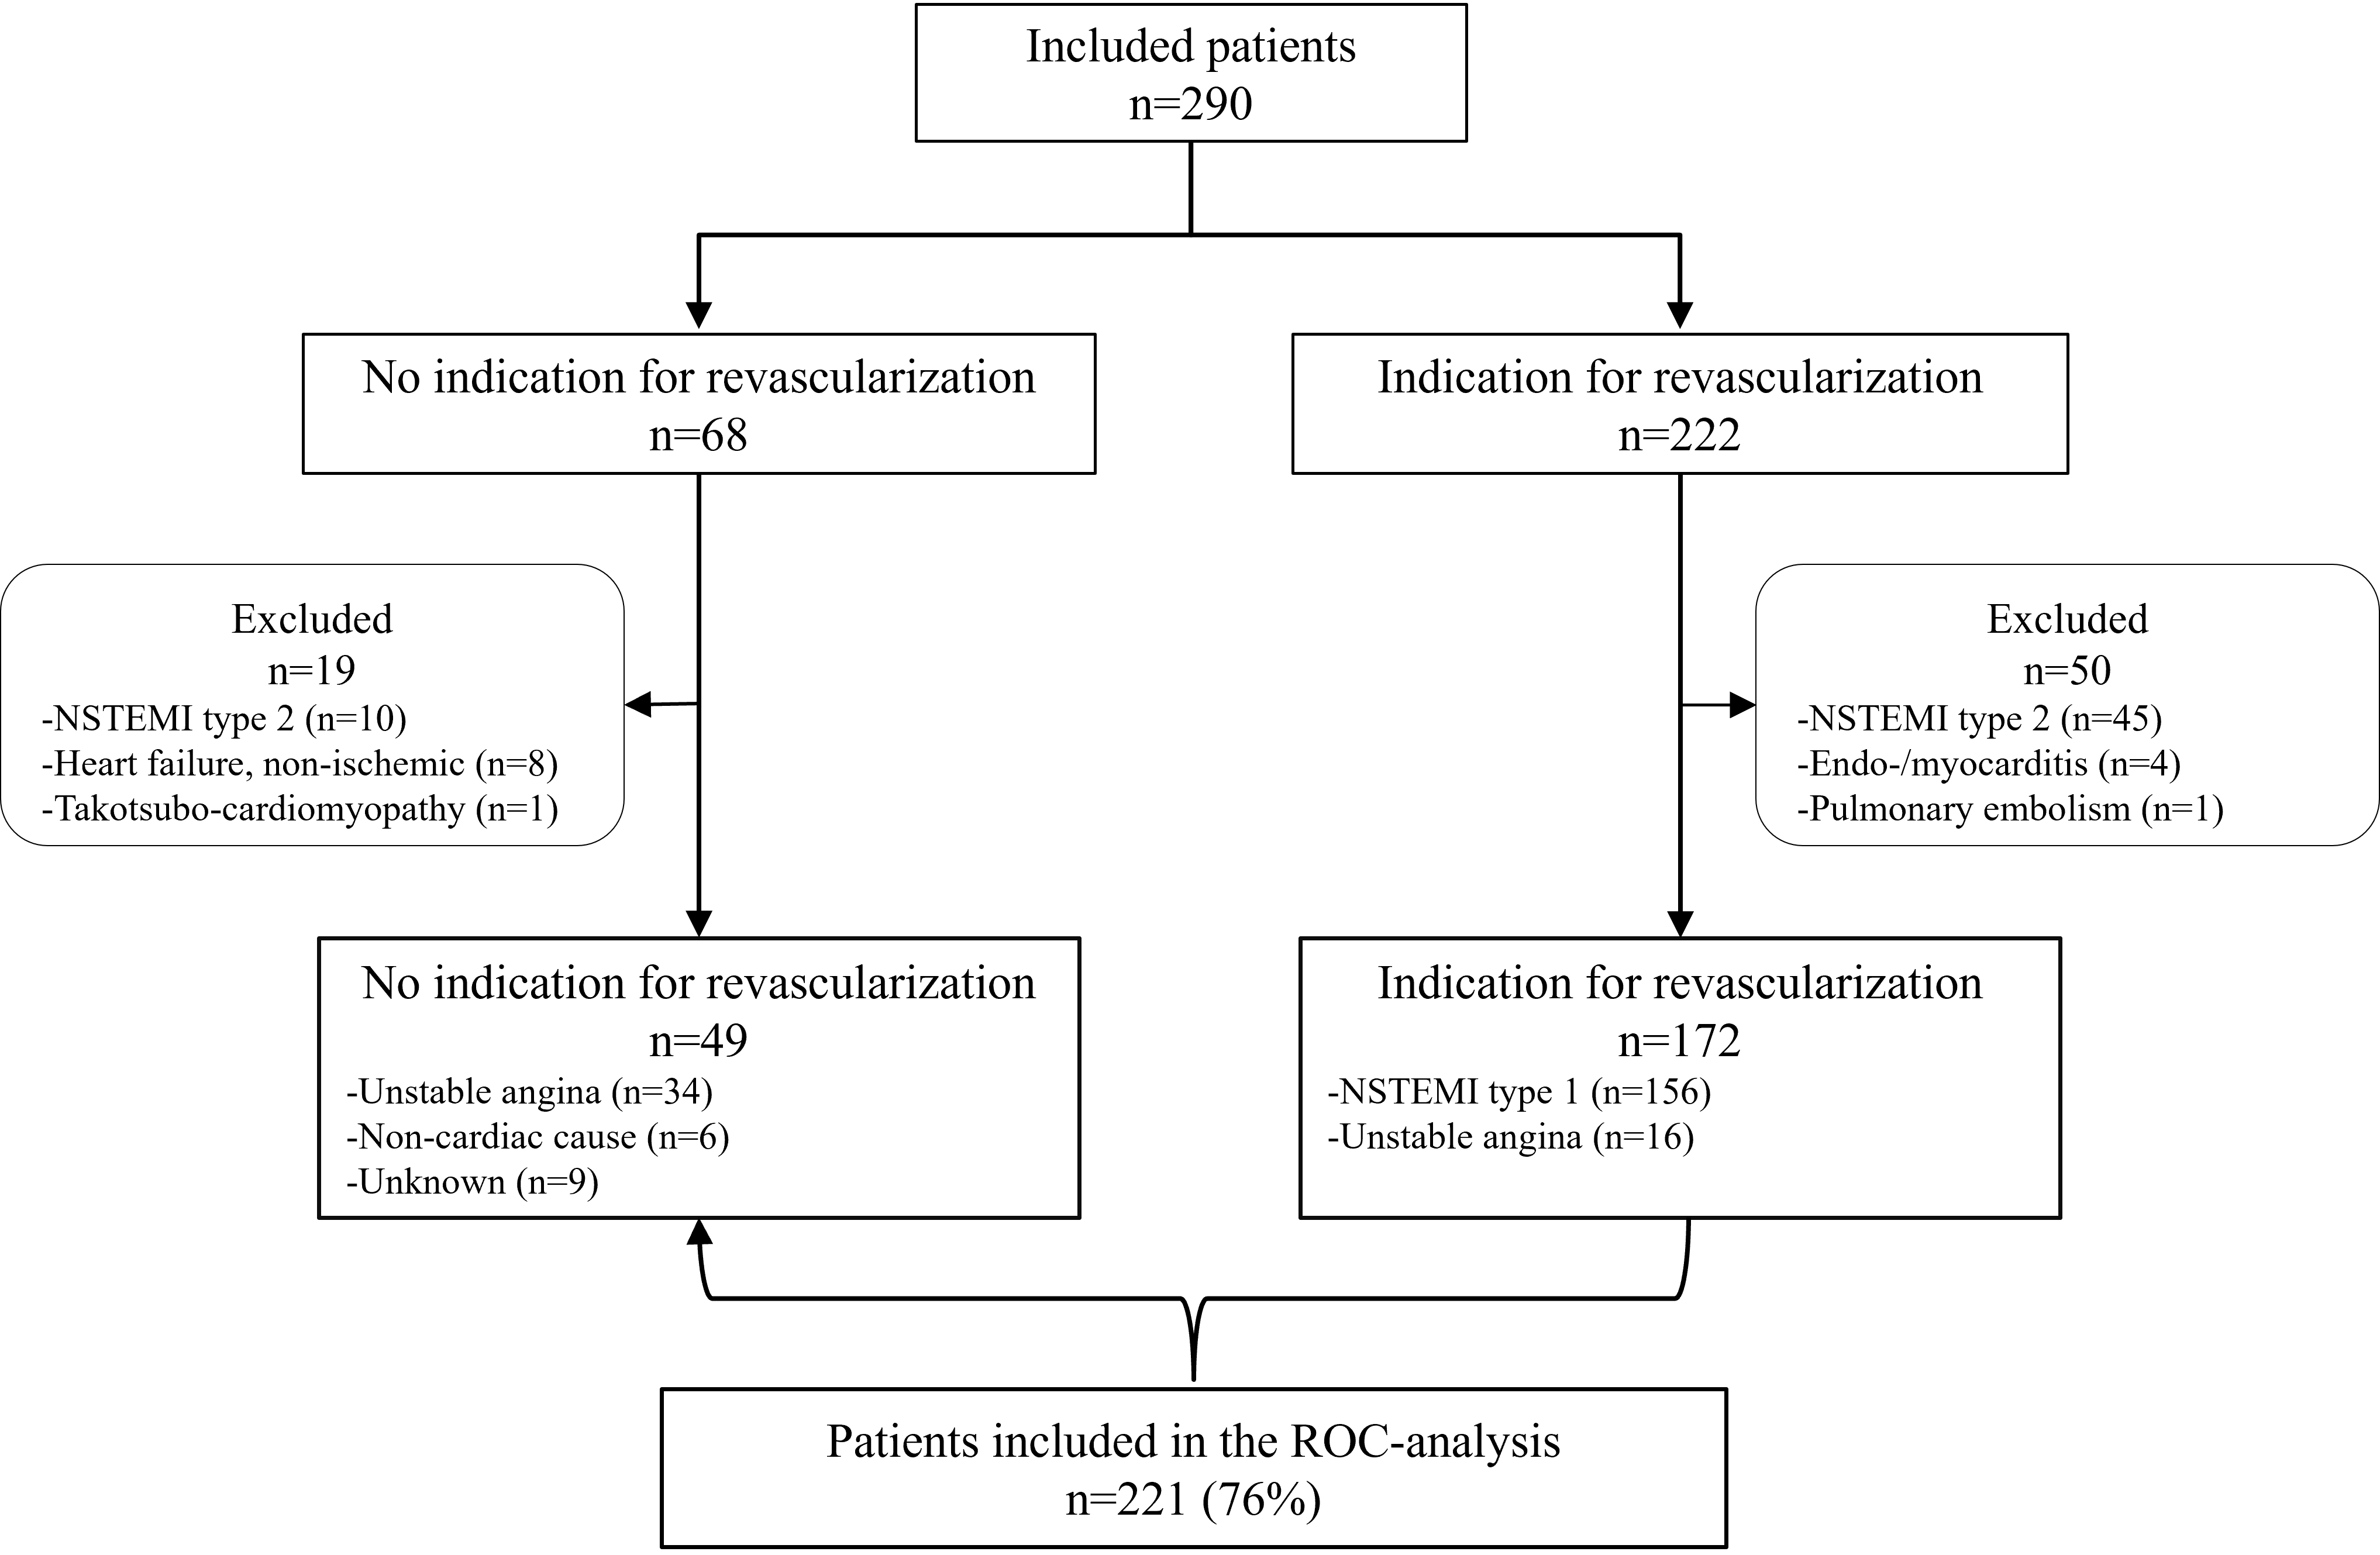


Severe CKD defined as eGFR <30 mL/min/1.73m2. CKD: chronic kidney disease; eGFR: estimated glomerular filtration rate according to the CKD-EPI creatinine equation; NSTEMI: non-ST-elevation acute myocardial infarction; ROC: receiver operating characteristic curve.

## Figure S2. Correlation between hs-cTnT and creatinine levels.


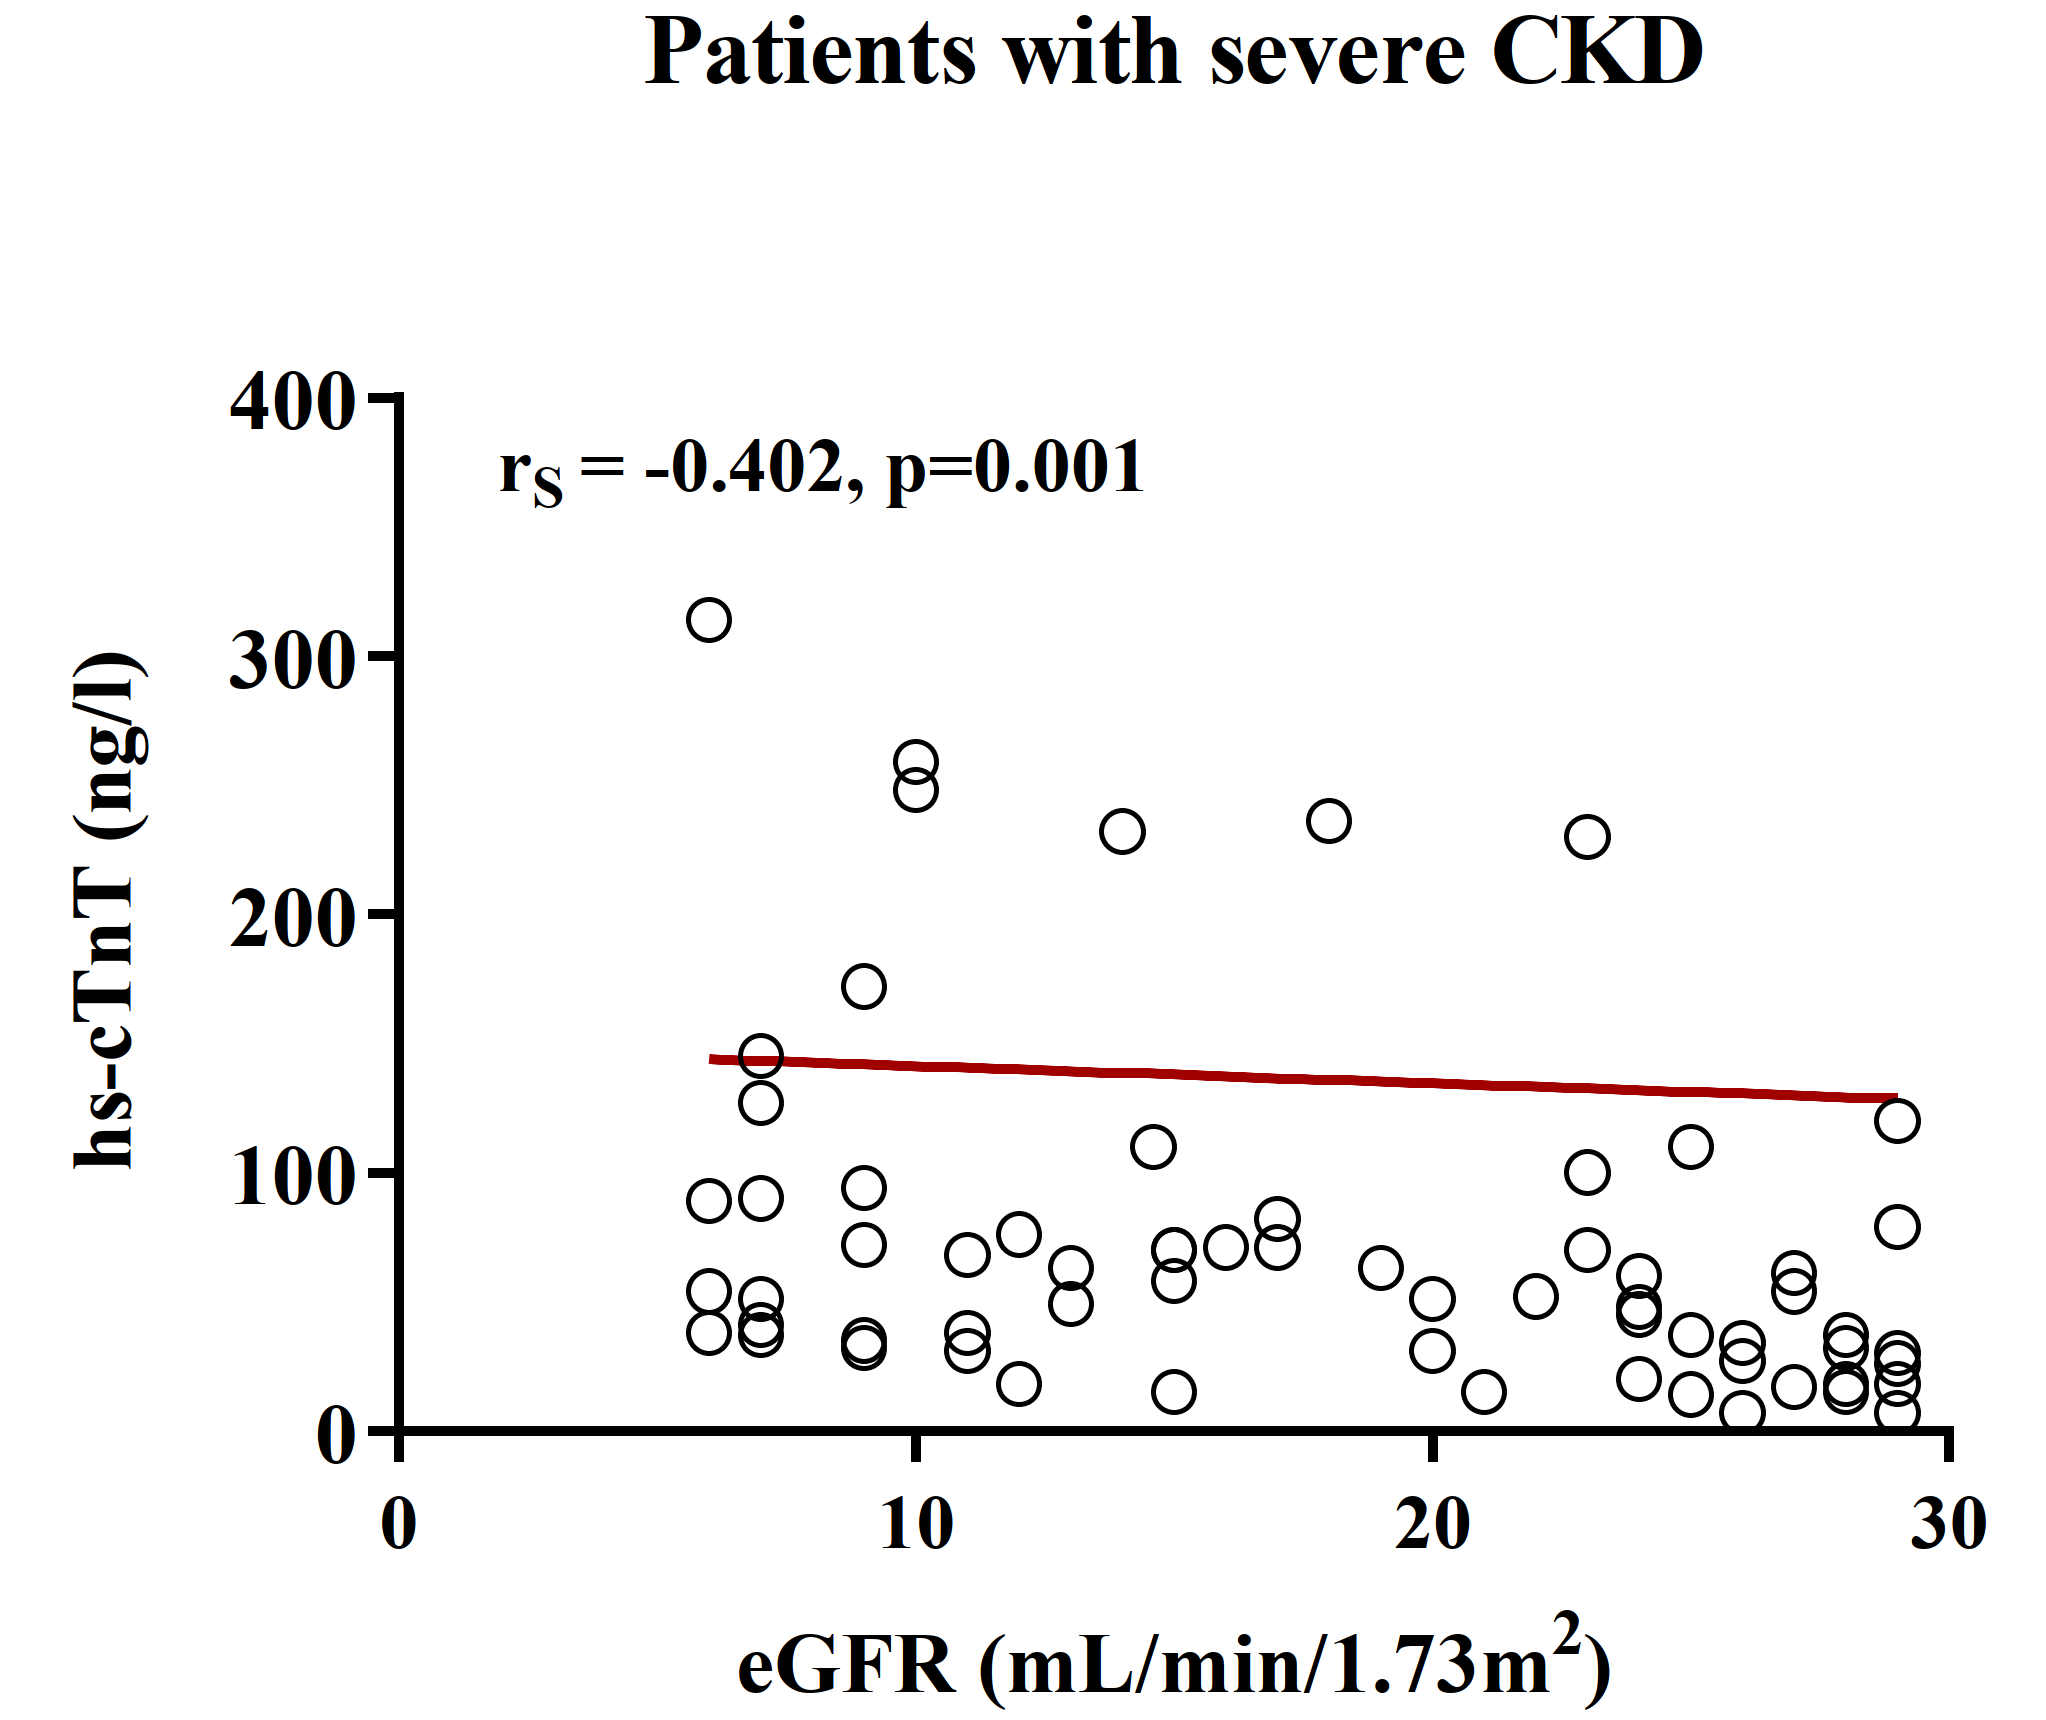


Depicted is the correlation between levels of hs-cTnT and creatinine in the non-revascularization subgroup of the cohort with severe CKD. Severe CKD defined as eGFR <30 mL/min/1.73m2. RS is the Spearman correlation coefficient. CKD: chronic kidney disease; eGFR: estimated glomerular filtration rate according to the CKD-EPI creatinine equation.

## **Figure S3.** Kaplan Meier estimates of adverse events at one year.


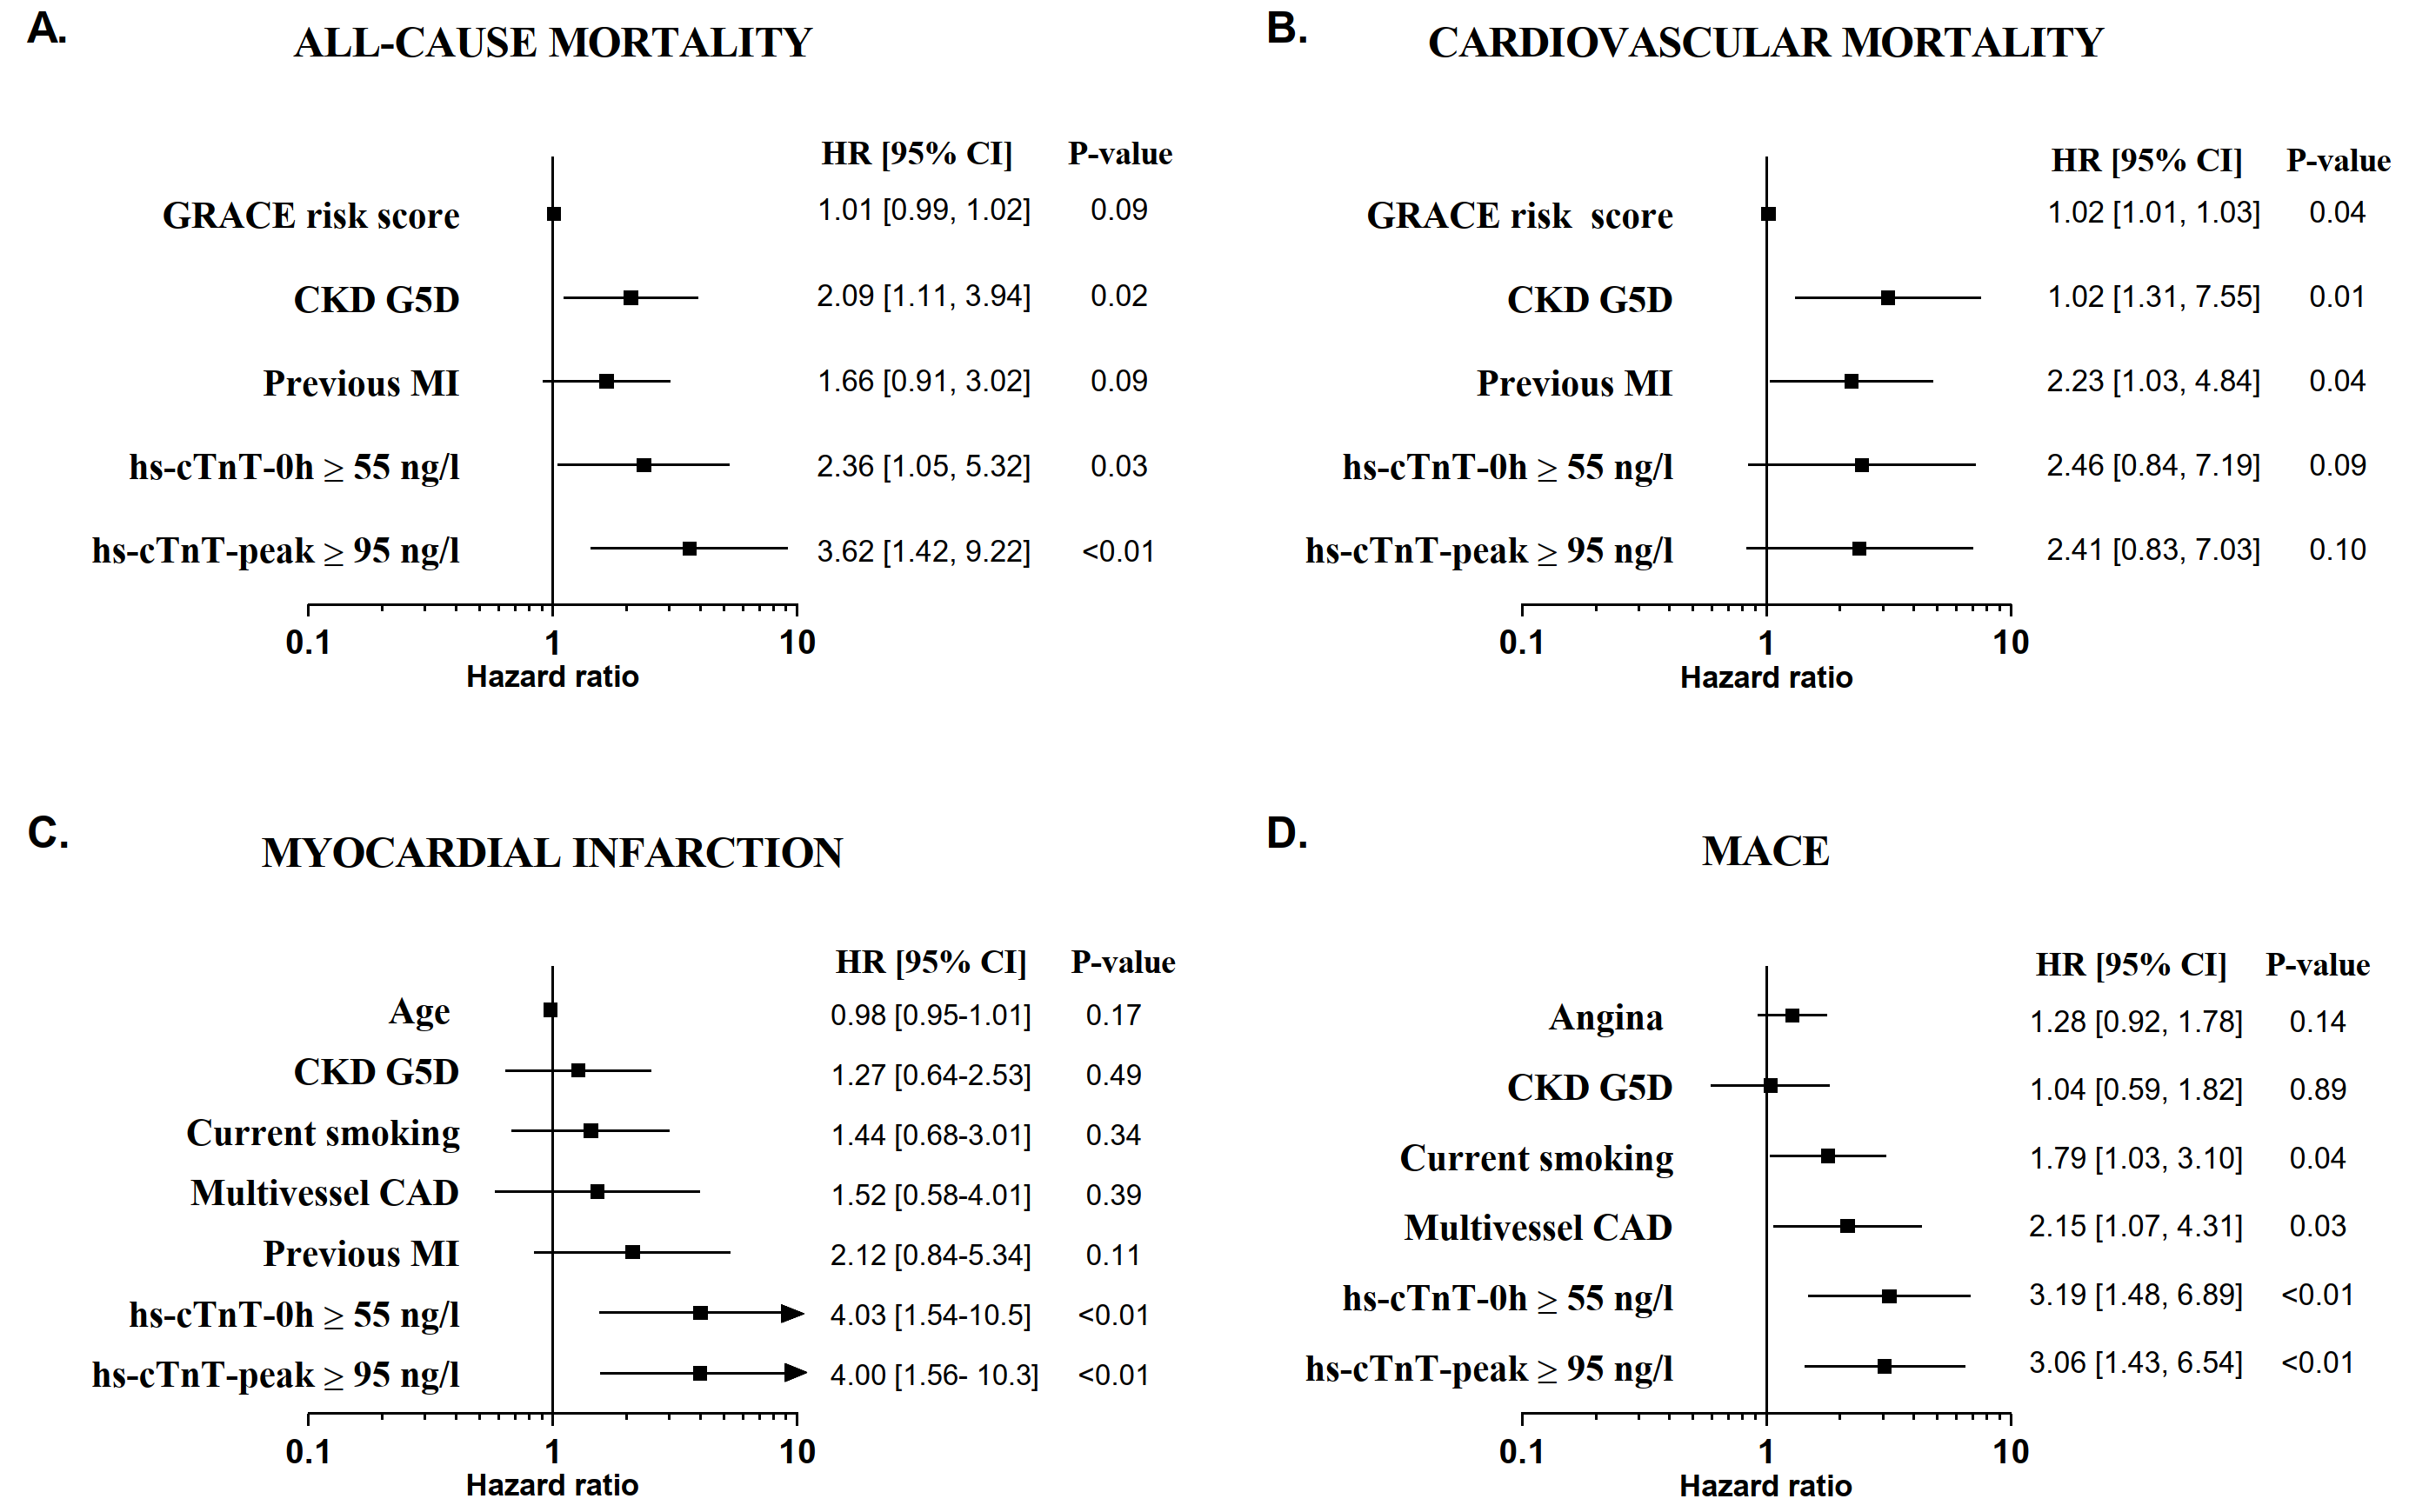


Depicted are the Kaplan Meier estimates of adverse events in patients with severe CKD (eGFR <30 mL/min/1.73m2) at one year, according to ROC optimized hs-cTnT cutoffs at presentation and peak of all-cause mortality (A and C) and MACE (B and D). Cumulative incidence (%) of events is from Kaplan Meier, crude hazard ratios (HR) and 95% CIs are from Cox regressions. CKD: chronic kidney disease; eGFR: estimated glomerular filtration rate according to the CKD-EPI creatinine equation; hs-cTnT: high sensitivity cardiac troponin T; MACE: composite of cardiovascular death, myocardial infarction or unplanned revascularization for ischemia; ROC: receiver-operating characteristic curve.

## Figure S4. Independent predictors of adverse events at one year


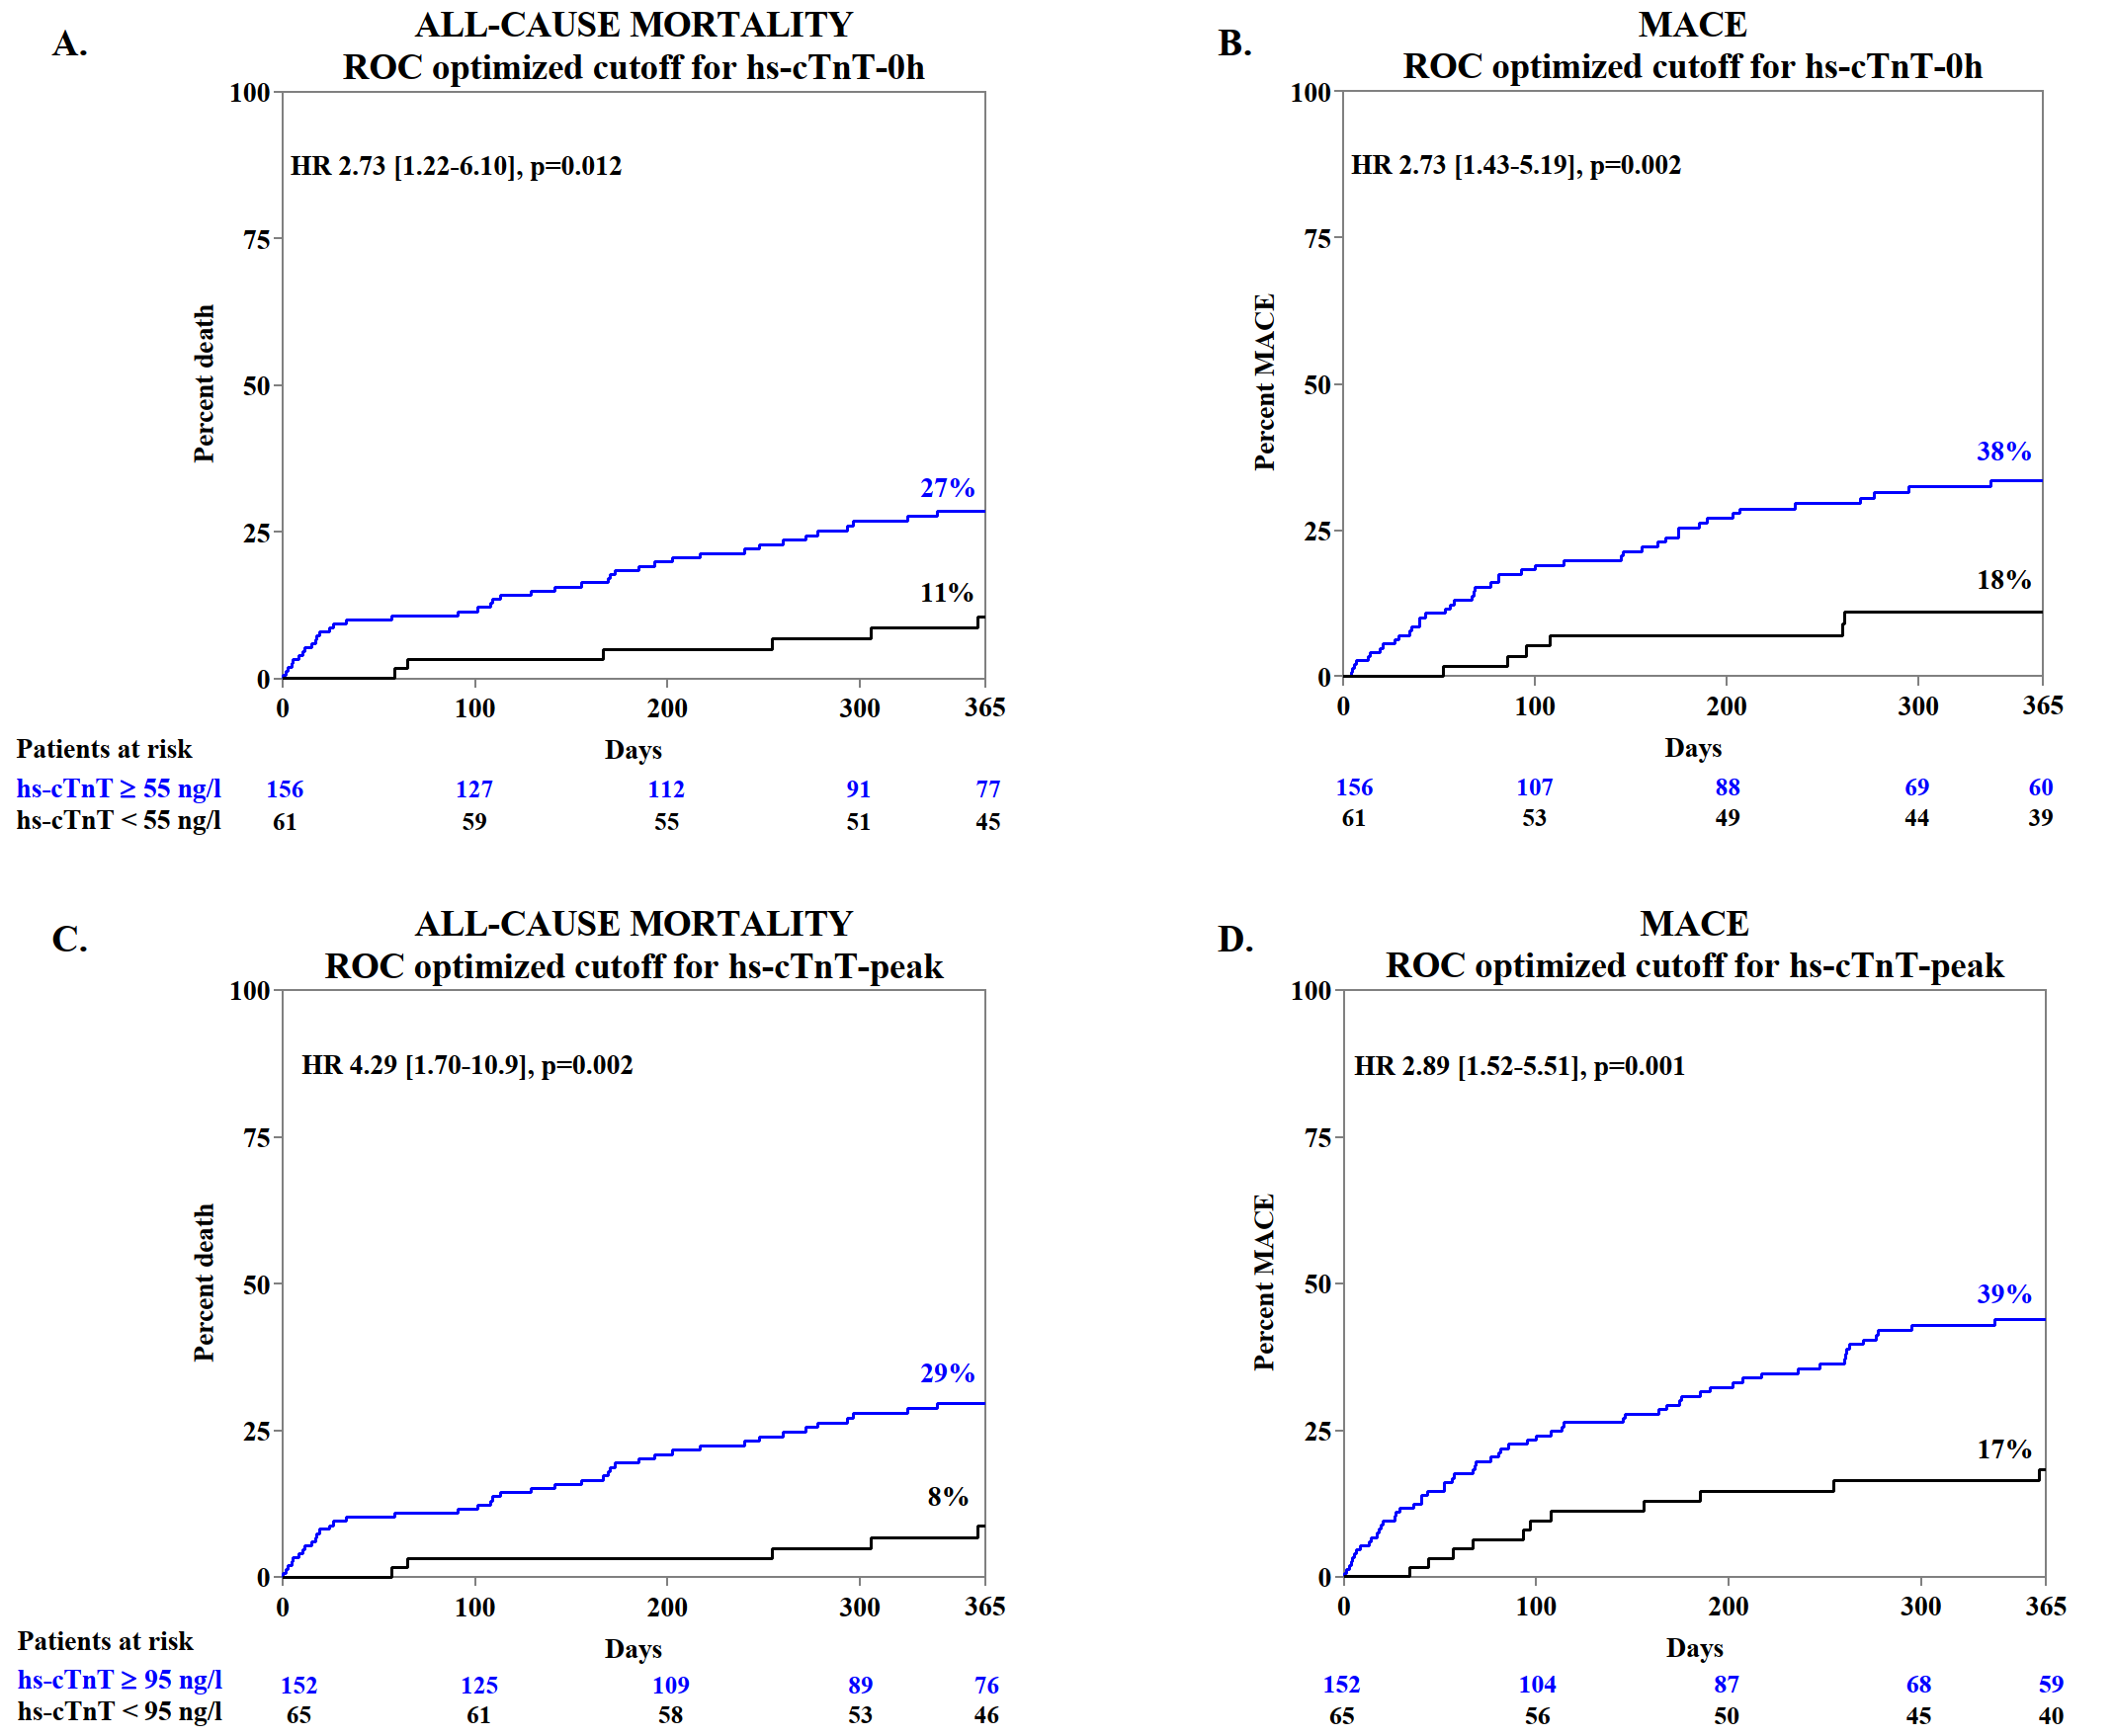


Depicted are the independent predictors of adverse events in patients with severe CKD (eGFR <30 mL/min/1.73m2) at one year: A) all-cause mortality, B) cardiovascular mortality, C) myocardial infarction and D) MACE. The symbols indicate the point estimate (hazard ratios [HR]) and the lines the 95% Confidence Intervals [95% CI] from multivariate logistic regression. The arrow indicates a CI-value beyond the shown axis limit. CAD: coronary artery disease; CKD: chronic kidney disease; eGFR: estimated glomerular filtration rate according to the CKD-EPI creatinine equation; CKD G5D: chronic kidney disease G5 treated by dialysis; GRACE: Global Registry of Acute Coronary Events; MI: myocardial infarction; MACE: composite of cardiovascular death, MI or unplanned revascularization for ischemia; ROC: receiver-operating characteristic curve.
